# Supplementary material for: Erbium-doped CsPbI2.5Br0.5 with enhanced crystalline quality and improved carrier lifetime for thermally stable all-inorganic perovskite solar cells
Source: Royal Society of Chemistry journal article supplement (doi:10.1039/d3se00564j), 2023-01-01
Supplement: d3se00564j1.pdf [file d3se00564j1.pdf]

## Supplementary Information for:

### **Erbium-Doped CsPbI<sub>2.5</sub>Br<sub>0.5</sub> with Enhanced Crystalline Quality and Improved Carrier Lifetime for Thermally Stable All-Inorganic Perovskite Solar Cells**

#### **Authors:**

Mengfei Zhu,<sup>1,#</sup> Lina Qin,<sup>1,#</sup> Yuren Xia,<sup>1,#</sup> Yi Hu,<sup>1</sup> Xinmei Song,<sup>1</sup> Daocheng Hong,<sup>1</sup>  
Yuxi Tian,<sup>1</sup> Zuoxiu Tie,<sup>1,2,3,\*</sup> and Zhong Jin<sup>1,2,3,\*</sup>

#### **Affiliations:**

<sup>1</sup> State Key Laboratory of Coordination Chemistry, MOE Key Laboratory of Mesoscopic Chemistry, MOE Key Laboratory of High Performance Polymer Materials and Technology, Jiangsu Key Laboratory of Advanced Organic Materials, School of Chemistry and Chemical Engineering, Nanjing University, Nanjing, Jiangsu 210023, China.

<sup>2</sup> Nanjing Tieming Energy Technology Co. Ltd., Nanjing, Jiangsu 210093, China.

<sup>3</sup> Suzhou Tierui New Energy Technology Co. Ltd., Suzhou, Jiangsu 215228, China.

<sup>#</sup> These three authors contributed equally to this work.

\* E-mail address of corresponding author: [zxtie@nju.edu.cn](mailto:zxtie@nju.edu.cn); [zhongjin@nju.edu.cn](mailto:zhongjin@nju.edu.cn).

## Experimental Section

### Chemicals and materials.

Lead iodide ( $\text{PbI}_2$ , 99.9985%, Alfa-Aesar), cesium iodide ( $\text{CsI}$ , 99.999%, Aladdin), cesium bromide ( $\text{CsBr}$ , 99.9%, Aladdin), Erbium chloride ( $\text{ErCl}_3$ , 99.99%, Alfa-Aesar), N,N-Dimethylformamide (DMF, 99.8%, anhydrous, Alfa-Aesar), isopropanol (99.8%, anhydrous, Aladdin), methanol (99.8%, anhydrous, Aladdin) and carbon paste (commercial conductive carbon paste). All reagents used were purchased from commercial sources without further purification unless stated otherwise.

### Film preparation and device fabrication.

Firstly, the fluorine-doped tin oxide (FTO)-coated glass substrates were etched by Zn powder and 2 M HCl for desirable patterns. Then, the FTO substrates were ultrasonically cleaned with acetone, ethanol and deionized water, respectively. The first layer *c*- $\text{TiO}_2$  was deposited on FTO electrodes by spin-coating an ethanol solution of titanium isopropoxide (0.5 M) and diethanol amine (0.5 M) at 7000 rpm for 30 s and annealing in air at 500 °C for 2 h. Then, the *m*- $\text{TiO}_2$  layer was deposited on the *c*- $\text{TiO}_2$  layer by spin-coating a mixture of 18NR-T  $\text{TiO}_2$  nanoparticle paste (20 nm diameter) and ethanol with the weight ratio of 1:8 at 5000 rpm for 30 s. The substrates were dried at 125 °C for 10 min and sintered at 500 °C for 30 min. Subsequently, 1-x% mmol  $\text{PbI}_2$  and x% mmol  $\text{ErCl}_3$  are dissolved in 1 mL N,N-dimethylformamide (DMF) under stirring at 80 °C for 12 h. Then, the precursor solution was spin-coated onto the FTO/*c*- $\text{TiO}_2$ /*m*- $\text{TiO}_2$  layer at 1500 rpm for 40 s, followed by drying at 80 °C for 60 min. Afterwards, the prepared substrates were dipped in a methanol solution of 0.03 M  $\text{CsI}$  and 0.03 M  $\text{CsBr}$  for 10 min. After being washed with isopropanol, the substrates were annealed at 390 °C for 10 min on a hotplate in air to form the layer of  $\text{CsPbI}_{2.5}\text{Br}_{0.5-x}\text{ErCl}_3$ . Finally, the carbon electrodes served as both HTM and counter electrode were blade-coated on  $\text{CsPbI}_{2.5}\text{Br}_{0.5-x}\text{ErCl}_3$  perovskite films, and heated at 70 °C for 60 min to form the counter electrode.

### Material characterizations.

To obtain the top-surface and cross-section morphologies of  $\text{CsPbI}_{2.5}\text{Br}_{0.5-x}\text{ErCl}_3$  perovskite films, scanning electron microscope (SEM) characterizations were

performed with a FEI NanoSEM Nova-450 instrument. X-ray diffraction (XRD) spectra were measured by a Bruker D-8 Advance diffractometer with Cu K $\alpha$  X-ray radiation. X-ray photoelectron spectroscopy (XPS) analyses on elemental binding energies and valence band maximum (VBM) positions were carried out with a PHI-5000 VersaProbe X-ray photoelectron spectrometer with Al K $\alpha$  X-ray radiation. The absorbance spectra of inorganic perovskite films were measured using a Shinadzu UV-2456 spectrophotometer in the light wavelength range of 300-800 nm with an interval of 0.2 nm. The photoluminescence (PL) spectra were recorded on a home-built wide-field fluorescence microscope under the excitation wavelength of 450 nm. The current density-voltage ( $J$ - $V$ ) curves were measured with a Keithley 2400 Source Meter under AM 1.5G illumination. The light intensity was calibrated with a standard Si solar cell for 1 sun. Typically, in this study, the active area of the all-inorganic PSCs was 0.09 cm<sup>2</sup> and the scan rate was 0.1 V/s.

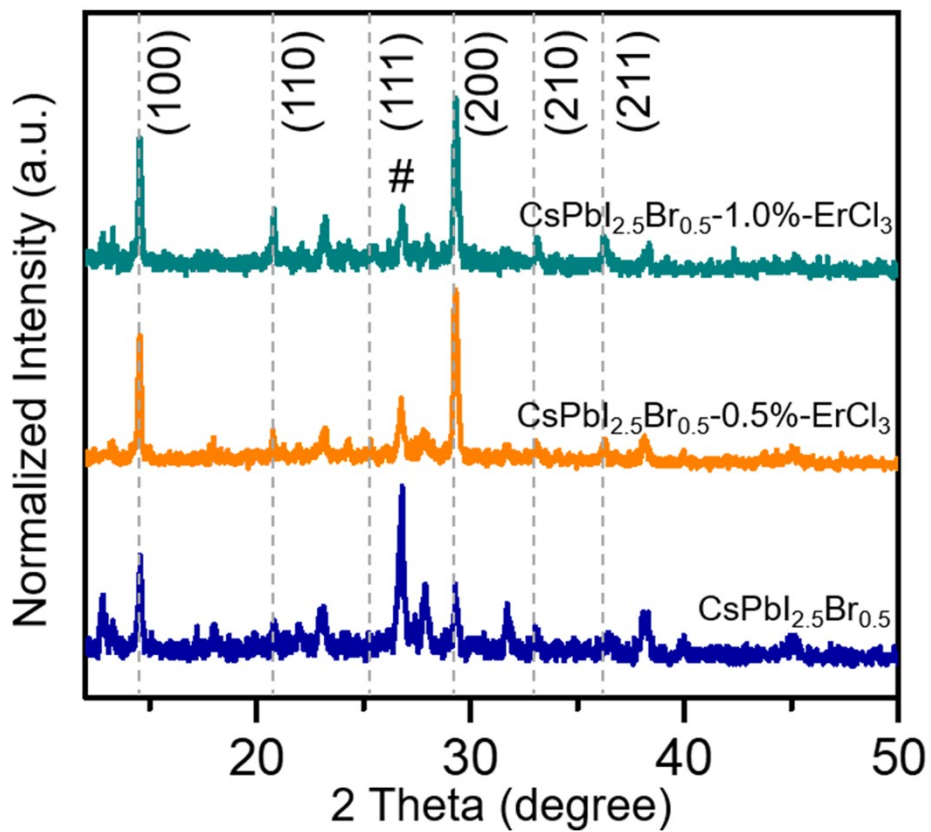

Figure S1 | XRD patterns of CsPbI<sub>2.5</sub>Br<sub>0.5</sub>-x%-ErCl<sub>3</sub> (x = 0, 0.5, 1.0) perovskite films.

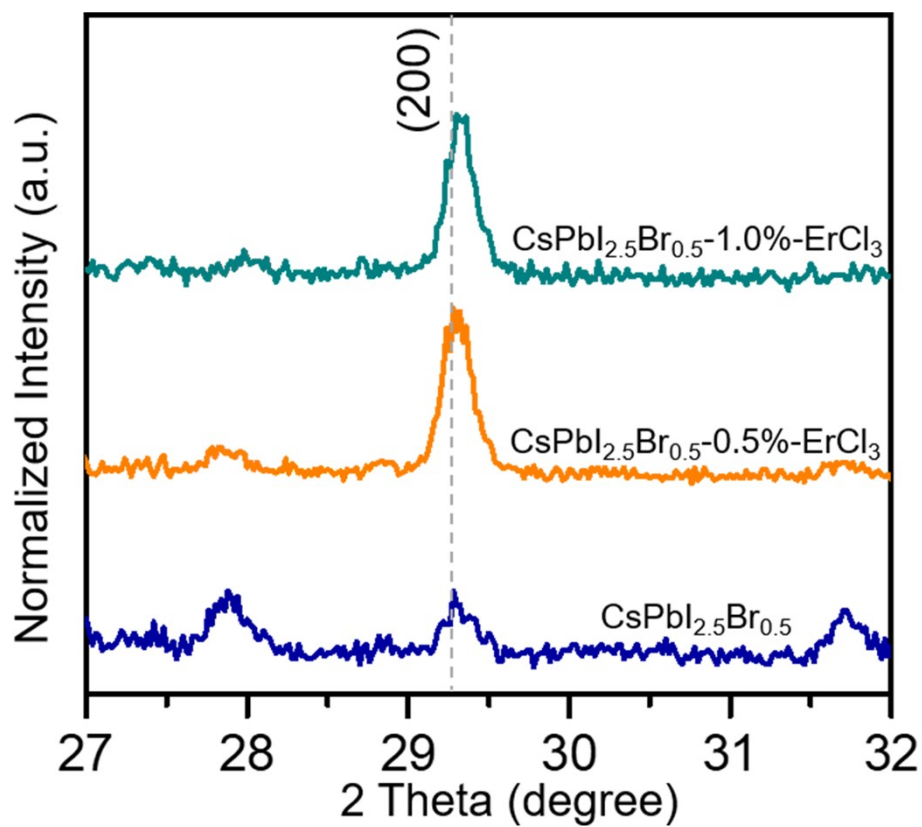

Figure S2 | Magnified (200) diffraction peaks in the XRD patterns of  $\text{CsPbI}_{2.5}\text{Br}_{0.5-x}\text{-ErCl}_3$  ( $x = 0, 0.5, 1.0$ ) perovskite films.

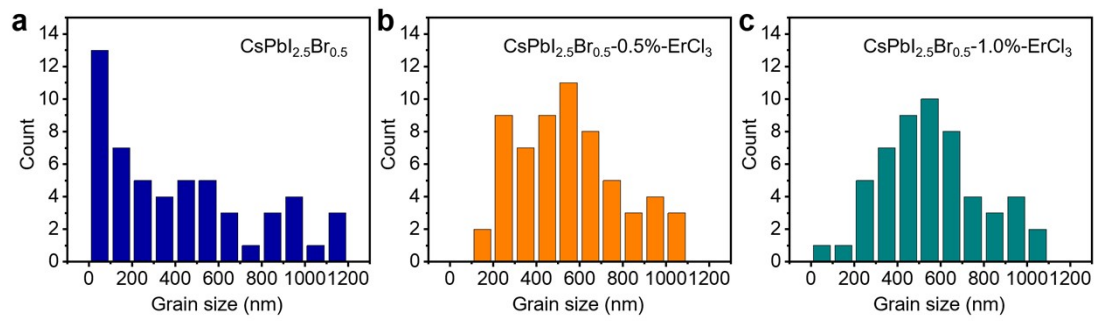

**Figure S3 | Grain size distribution histograms of as-prepared CsPbI<sub>2.5</sub>Br<sub>0.5</sub>-x%-ErCl<sub>3</sub> thin films.**

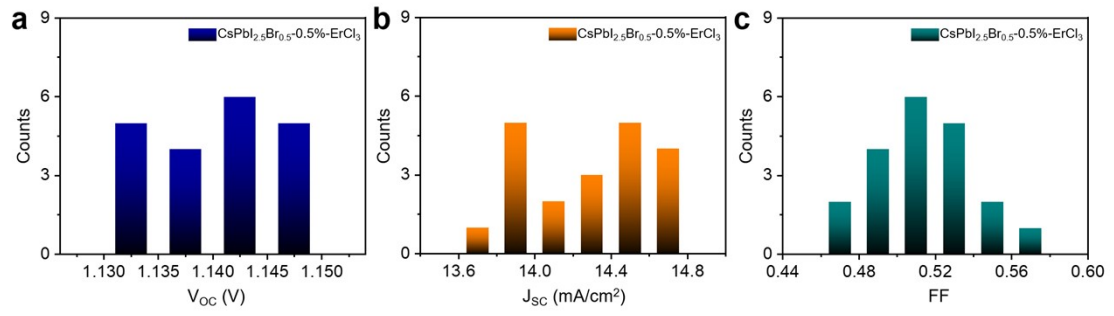

**Figure S4 | Statistical histograms of (a)  $V_{OC}$ , (b)  $J_{SC}$ , and (c) FF distributions of 20 individual  $\text{CsPbI}_{2.5}\text{Br}_{0.5}\text{-0.5\%-ErCl}_3$  based AIPSCs.**

**Extended Table S1 | XPS binding energies of different elements measured from the as-prepared CsPbI<sub>2.5</sub>Br<sub>0.5-x</sub>%-ErCl<sub>3</sub> (x = 0, 0.5, 1.0) perovskite films.**

| Binding energy<br>(eV)                                             | C<br>1s | Cs<br>3d <sub>5/2</sub> | Cs<br>3d <sub>3/2</sub> | Pb<br>4f <sub>7/2</sub> | Pb<br>4f <sub>5/2</sub> | I<br>3d <sub>5/2</sub> | I<br>3d <sub>3/2</sub> |
|--------------------------------------------------------------------|---------|-------------------------|-------------------------|-------------------------|-------------------------|------------------------|------------------------|
| CsPbI <sub>2.5</sub> Br <sub>0.5</sub> -0%-<br>ErCl <sub>3</sub>   | 284.8   | 724.5                   | 738.4                   | 138.0                   | 142.9                   | 618.9                  | 630.4                  |
| CsPbI <sub>2.5</sub> Br <sub>0.5</sub> -0.5%-<br>ErCl <sub>3</sub> | 284.8   | 724.6                   | 738.5                   | 138.1                   | 143.0                   | 619.0                  | 630.5                  |
| CsPbI <sub>2.5</sub> Br <sub>0.5</sub> -1.0%-<br>ErCl <sub>3</sub> | 284.8   | 724.7                   | 738.6                   | 138.1                   | 143.0                   | 619.1                  | 630.5                  |

| Binding energy<br>(eV)                                             | Br<br>3d <sub>5/2</sub> | Br<br>3d <sub>3/2</sub> | Er<br>4d | Cl<br>2p <sub>3/2</sub> | Cl<br>2p <sub>1/2</sub> |
|--------------------------------------------------------------------|-------------------------|-------------------------|----------|-------------------------|-------------------------|
| CsPbI <sub>2.5</sub> Br <sub>0.5</sub> -0%-<br>ErCl <sub>3</sub>   | 68.5                    | 69.5                    | --       | --                      | --                      |
| CsPbI <sub>2.5</sub> Br <sub>0.5</sub> -0.5%-<br>ErCl <sub>3</sub> | 68.5                    | 69.7                    | 169.3    | 198.2                   | 199.5                   |
| CsPbI <sub>2.5</sub> Br <sub>0.5</sub> -1.0%-<br>ErCl <sub>3</sub> | 68.7                    | 69.7                    | 169.3    | 198.3                   | 199.5                   |



**Extended Table S2 | Photovoltaic parameters of the as-assembled CsPbI<sub>2.5</sub>Br<sub>0.5-x</sub>%-ErCl<sub>3</sub> (x = 0, 0.5, 1.0) based AIPSCs.**

| <b>Absorber layer</b>                                              | <b>Band gap<br/>(eV)</b> | <b><i>J</i><sub>SC</sub><br/>(mA/cm<sup>2</sup>)</b> | <b><i>V</i><sub>OC</sub><br/>(V)</b> | <b>FF</b> | <b>PCE<br/>(%)</b> |
|--------------------------------------------------------------------|--------------------------|------------------------------------------------------|--------------------------------------|-----------|--------------------|
| CsPbI <sub>2.5</sub> Br <sub>0.5</sub> -0%-ErCl <sub>3</sub>       | 1.81                     | 13.29                                                | 1.08                                 | 0.49      | 7.05               |
| CsPbI <sub>2.5</sub> Br <sub>0.5</sub> -0.5%-<br>ErCl <sub>3</sub> | 1.80                     | 14.71                                                | 1.15                                 | 0.55      | 9.22               |
| CsPbI <sub>2.5</sub> Br <sub>0.5</sub> -1.0%-<br>ErCl <sub>3</sub> | 1.79                     | 12.63                                                | 1.13                                 | 0.55      | 7.85               |

**Extended Table S3 | Photovoltaic performance comparison of existing AIPSCs with Cs-based inorganic perovskite absorbers and carbon-based counter electrodes.**

| Ref.             | Cell configuration                                                                                                                                   | $E_g$<br>(eV) | $J_{sc}$<br>(mA/cm <sup>2</sup> ) | $V_{oc}$<br>(V) | FF          | PCE<br>(%)  |
|------------------|------------------------------------------------------------------------------------------------------------------------------------------------------|---------------|-----------------------------------|-----------------|-------------|-------------|
| <b>This work</b> | <b>FTO/<i>c</i>-TiO<sub>2</sub>/<i>m</i>-TiO<sub>2</sub>/CsPbI<sub>2.5</sub>Br<sub>0.5</sub>-0.5%-ErCl<sub>3</sub>/Carbon</b>                        | <b>1.80</b>   | <b>14.71</b>                      | <b>1.15</b>     | <b>0.55</b> | <b>9.22</b> |
| [38]             | FTO/ <i>c</i> -TiO <sub>2</sub> / <i>m</i> -TiO <sub>2</sub> /CsPb <sub>0.97</sub> Sm <sub>0.03</sub> Br <sub>3</sub> /Carbon                        | --            | 7.48                              | 1.59            | 0.85        | 10.14       |
| [45]             | FTO/TiO <sub>2</sub> /CsBr/CsPbIBr <sub>2</sub> /Carbon                                                                                              | 2.04          | 11.80                             | 1.26            | 0.72        | 10.71       |
| [46]             | FTO/ <i>c</i> -TiO <sub>2</sub> /CsPbIBr <sub>2</sub> /Carbon                                                                                        | 2.05          | 10.66                             | 1.25            | 0.69        | 9.16        |
| [47]             | FTO/ <i>c</i> -TiO <sub>2</sub> /CsPbIBr <sub>2</sub> /Carbon                                                                                        | 2.05          | 11.17                             | 1.28            | 0.60        | 8.60        |
| [48]             | ITO/passivated SnO <sub>2</sub> /CsPbIBr <sub>2</sub> /Carbon                                                                                        | 2.03          | 8.50                              | 1.23            | 0.67        | 7.00        |
| [49]             | FTO/ <i>c</i> -TiO <sub>2</sub> /CsPbIBr <sub>2</sub> /Carbon                                                                                        | 2.05          | 9.11                              | 1.14            | 0.63        | 6.55        |
| [18]             | FTO/ <i>c</i> -TiO <sub>2</sub> / <i>m</i> -TiO <sub>2</sub> /CsPbIBr <sub>2</sub> /Carbon                                                           | 1.90          | 12.32                             | 1.08            | 0.62        | 8.25        |
| [18]             | FTO/ <i>c</i> -TiO <sub>2</sub> / <i>m</i> -TiO <sub>2</sub> /CsPb <sub>0.9</sub> Sn <sub>0.1</sub> IBr <sub>2</sub> /Carbon                         | 1.79          | 14.30                             | 1.26            | 0.63        | 11.33       |
| [19]             | FTO/ <i>c</i> -TiO <sub>2</sub> / <i>m</i> -TiO <sub>2</sub> /CsPb <sub>0.995</sub> Mn <sub>0.005</sub> I <sub>1.01</sub> Br <sub>1.99</sub> /Carbon | 1.85          | 13.15                             | 0.99            | 0.57        | 7.36        |
| [50]             | FTO/TiO <sub>2</sub> /CsPbBr <sub>3</sub> /Carbon                                                                                                    | 1.83          | 5.30                              | 1.20            | 0.64        | 3.90        |
| [51]             | FTO/TiO <sub>2</sub> /α-CsPbI <sub>3</sub> /Carbon                                                                                                   | 1.68          | 18.5                              | 0.79            | 0.65        | 9.50        |
| [52]             | FTO/ <i>c</i> -TiO <sub>2</sub> /CsPbBr <sub>3</sub> /Carbon                                                                                         | 2.30          | 6.46                              | 1.34            | 0.68        | 3.60        |
| [53]             | ITO/SnO <sub>2</sub> /CsPbI <sub>2</sub> Br/Carbon                                                                                                   | 1.91          | 13.68                             | 1.20            | 0.69        | 11.34       |
| [54]             | FTO/ <i>c</i> -TiO <sub>2</sub> /CsPbI <sub>2</sub> Br/Carbon                                                                                        | 1.91          | 13.54                             | 1.15            | 0.64        | 10.00       |
| [55]             | ITO/PEDOT:PSS/CsPbI <sub>2</sub> Br/SnPc/Carbon                                                                                                      | 1.91          | 13.69                             | 1.24            | 0.67        | 11.39       |
| [56]             | FTO/ <i>c</i> -TiO <sub>2</sub> /CsPbI <sub>2</sub> Br/Carbon                                                                                        | 1.91          | 13.36                             | 1.14            | 0.62        | 9.38        |
| [57]             | ITO/SnO <sub>2</sub> /CsPbI <sub>2</sub> Br/Carbon                                                                                                   | 1.92          | 14.20                             | 1.27            | 0.62        | 11.20       |
| [58]             | ITO/SnO <sub>2</sub> /CsPbI <sub>2</sub> Br/Carbon                                                                                                   | 1.85          | 12.06                             | 1.20            | 0.72        | 10.42       |
| [59]             | ITO/SnO <sub>2</sub> /CsPbI <sub>2</sub> Br/Co <sub>3</sub> O <sub>4</sub> /Carbon                                                                   | 1.82          | 13.09                             | 1.19            | 0.72        | 11.21       |



**Extended Table S4 | Photovoltaic parameters of as-assembled 20 individual CsPbI<sub>2.5</sub>Br<sub>0.5</sub>-0.5%-ErCl<sub>3</sub> based AIPSCs.**

| <b>Device No.</b> | <b><math>J_{SC}</math> (mA/cm<sup>2</sup>)</b> | <b><math>V_{OC}</math> (V)</b> | <b>FF</b> | <b>PCE (%)</b> | <b>Device No.</b> | <b><math>J_{SC}</math> (mA/cm<sup>2</sup>)</b> | <b><math>V_{OC}</math> (V)</b> | <b>FF</b> | <b>PCE (%)</b> |
|-------------------|------------------------------------------------|--------------------------------|-----------|----------------|-------------------|------------------------------------------------|--------------------------------|-----------|----------------|
| <b>1</b>          | 14.71                                          | 1.15                           | 0.54      | 9.22           | <b>11</b>         | 14.65                                          | 1.09                           | 0.52      | 8.28           |
| <b>2</b>          | 14.84                                          | 1.15                           | 0.53      | 9.09           | <b>12</b>         | 12.77                                          | 1.12                           | 0.58      | 8.26           |
| <b>3</b>          | 14.82                                          | 1.15                           | 0.52      | 8.86           | <b>13</b>         | 13.76                                          | 1.16                           | 0.51      | 8.21           |
| <b>4</b>          | 14.68                                          | 1.14                           | 0.53      | 8.81           | <b>14</b>         | 12.66                                          | 1.16                           | 0.56      | 8.18           |
| <b>5</b>          | 14.17                                          | 1.12                           | 0.55      | 8.70           | <b>15</b>         | 13.99                                          | 1.15                           | 0.50      | 8.04           |
| <b>6</b>          | 13.18                                          | 1.17                           | 0.56      | 8.66           | <b>16</b>         | 13.00                                          | 1.06                           | 0.58      | 7.98           |
| <b>7</b>          | 13.74                                          | 1.15                           | 0.54      | 8.52           | <b>17</b>         | 14.10                                          | 1.02                           | 0.55      | 7.92           |
| <b>8</b>          | 13.17                                          | 1.17                           | 0.55      | 8.51           | <b>18</b>         | 13.15                                          | 1.12                           | 0.53      | 7.82           |
| <b>9</b>          | 13.71                                          | 1.19                           | 0.52      | 8.48           | <b>19</b>         | 12.71                                          | 1.10                           | 0.55      | 7.70           |
| <b>10</b>         | 12.24                                          | 1.17                           | 0.58      | 8.45           | <b>20</b>         | 10.73                                          | 1.16                           | 0.58      | 7.33           |
